# Supplementary material for: Organic–inorganic nanohybrids and their applications in silver extraction, chromogenic Cu2+ detection in biological systems, and hemolytic assay
Source: Royal Society of Chemistry journal article supplement (doi:10.1039/c4ra00808a), 2014-01-01
Supplement: c4ra00808a1.pdf [file c4ra00808a1.pdf]

## Supporting Information

### **Organic – Inorganic Nanohybrids and their applications in Silver Extraction, Chromogenic Cu<sup>2+</sup> detection in Biological Systems, and Hemolytic Assay**

Ajnesh Singh<sup>a</sup>, Vimal Kumar Bhardwaj<sup>a</sup>, Gurinder Kaur<sup>b</sup>, Kamalpreet Kaur<sup>a</sup>, Narinder Singh<sup>a,\*</sup>, Mandeep Singh Bakshi<sup>c,\*</sup>

**Figure S1** Green curve shows the IRF along with the sample signal.

**Figure S2** XRD patterns of dried FONPs at 75 °C.

**Figure S3(A-G)** Family of partial <sup>1</sup>H NMR recorded in DMSO(*d*<sub>6</sub>) / D<sub>2</sub>O (9.5/0.5; v/v) solvent system; showing shifts in aromatic and -CH=N signals upon successive addition of Ag<sup>+</sup> salt to the solution organic host: (A) Organic Host (OH) only, (B) OH + Ag salt (0.5 equiv), (C) OH + Ag salt (1.0 equiv), (D) OH + Ag salt (1.5 equiv), (E) OH + Ag salt (2.0 equiv), (F) OH + Ag salt (3.0 equiv), (G) OH + Ag salt (5.0 equiv).

**Figure S4** A comparison of IR spectra of pure host (Blue-Green line) and metal complex (Brown line), showing the shift in band responsible for -CH=N.

**Figure S5** SEM images of AgNP@FONPs and AgNP when AgNP@FONPs were dissolved in THF/H<sub>2</sub>O

**Figure S6** Plot showing the detection limit of Cu<sup>2+</sup> ions.

**Figure S7** Histogram showing the amount of intensity towards the selectivity of Cu<sup>2+</sup> ions binding to Ag@FONPs in the presence of other ions.

**Figure S8** Effect of pH on the UV-visible absorbance of Ag@ONPs.

**Figure S9** UV-Vis profile of AgNP@FONPs, AgNP@FONPs + Cu<sup>2+</sup> (50mM) and AgNP@FONPs + Cu<sup>2+</sup> (50mM) + EDTA (50mM).

**Figure 10** Changes in UV-Vis spectra of AgNPs @FONPs on addition of Cu<sup>2+</sup> ion after different time intervals

**Figure S11** UV-Vis profile on addition of 50mM of Cu<sup>+</sup> to the AgNP@FNOP solution in aqueous THF (8:2, v/v).

**Figure S12a:** Changes in the Fluorescent spectrum on addition various metal ion to the solution of Ag@FONPs.

**Figure S12b:** Changes in the Fluorescent spectrum on addition various anions to the solution of Ag@FONPs.

**Figure S13 :** Changes in the absorption behaviour of AgNP@FONPs +Cu<sup>2+</sup> ( at 1, 3, 4, 5, 8,30 and 50 mM concentration of Cu<sup>2+</sup>); the same experimnt was conducted in blood serum at same concentration as that of Cu<sup>2+</sup> ion (1a, 3a, 4a, 5a, 8a, 30a and 50a).

**Figure S14** Photos show the extent hemolysis for the samples with +ive control, -ive control, and different amounts of NPs along with their corresponding absorbance in the inset.

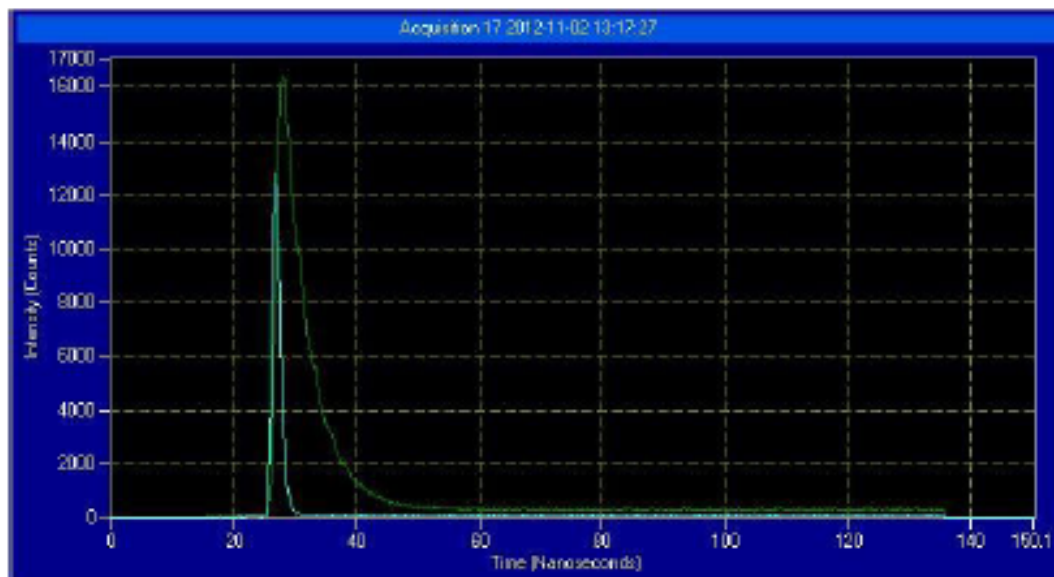

**Figure S1** Green curve shows the IRF along with the sample signal.

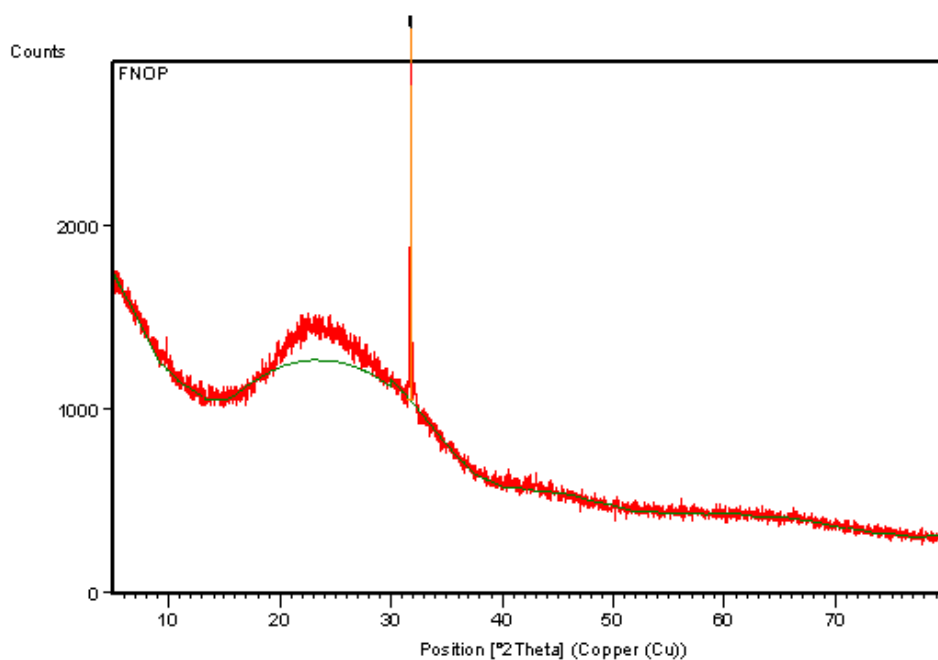

**Figure S2** XRD patterns of dried FONPs at 75 °C.

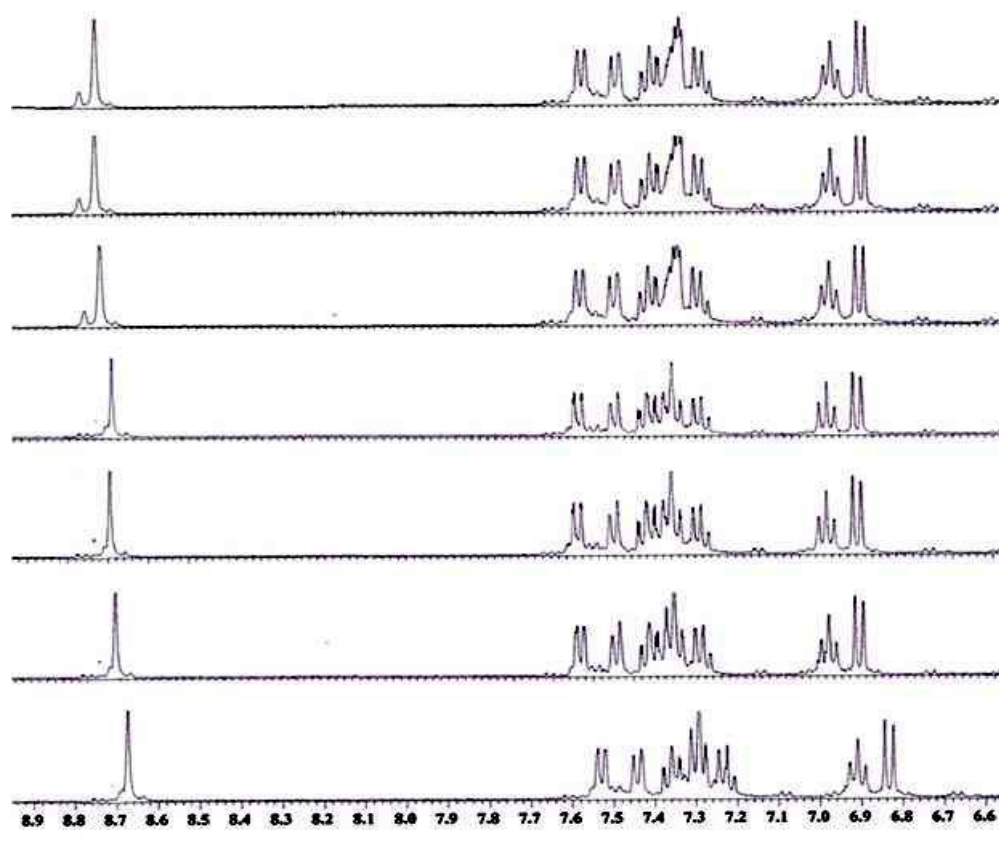

**Figure S3(A-G)** Family of partial  $^1\text{H}$  NMR recorded in  $\text{DMSO}(d_6) / \text{D}_2\text{O}$  (9.5/0.5; v/v) solvent system; showing shifts in aromatic and  $-\text{CH}=\text{N}$  signals upon successive addition of  $\text{Ag}^+$  salt to the solution organic host: (A) Organic Host (OH) only, (B) OH + Ag salt (0.5 equiv), (C) OH + Ag salt (1.0 equiv), (D) OH + Ag salt (1.5 equiv), (E) OH + Ag salt (2.0 equiv), (F) OH + Ag salt (3.0 equiv), (G) OH + Ag salt (5.0 equiv).

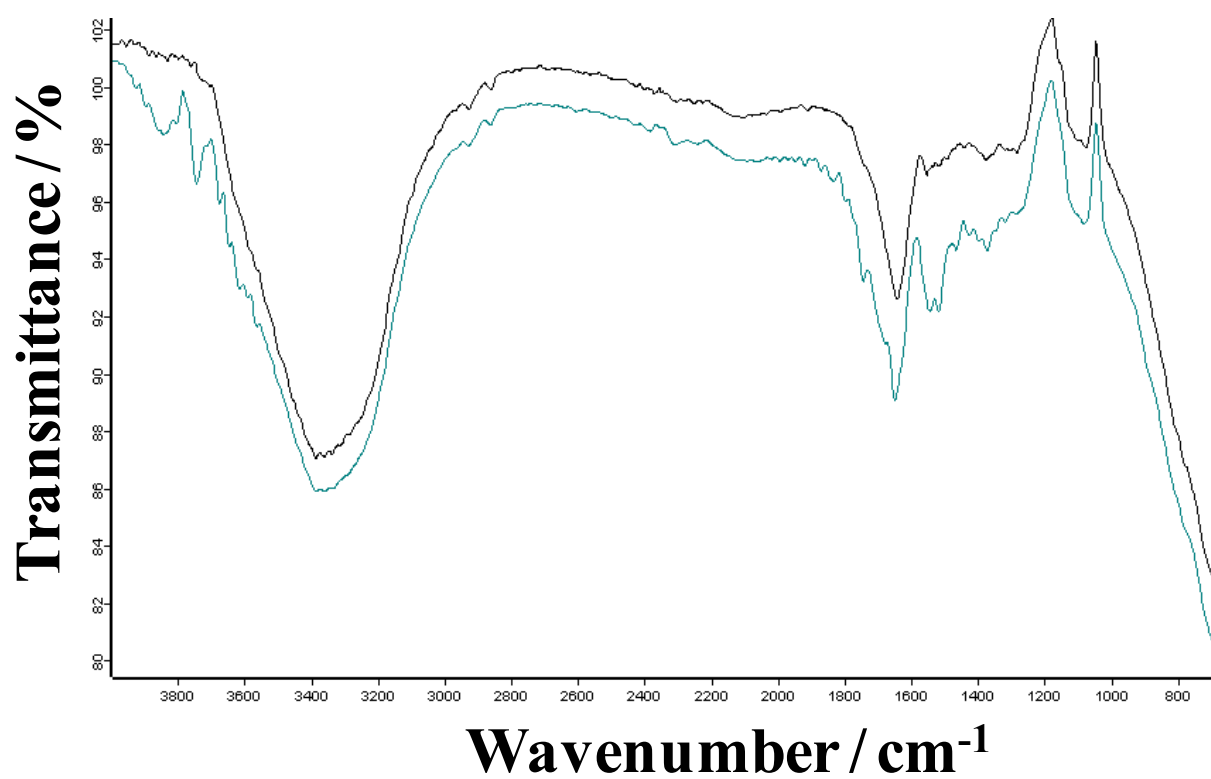

**Figure S4** A comparison of IR spectra of pure host (Blue-Green line) and metal complex (Brown line), showing the shift in band responsible for  $-\text{CH}=\text{N}$ .

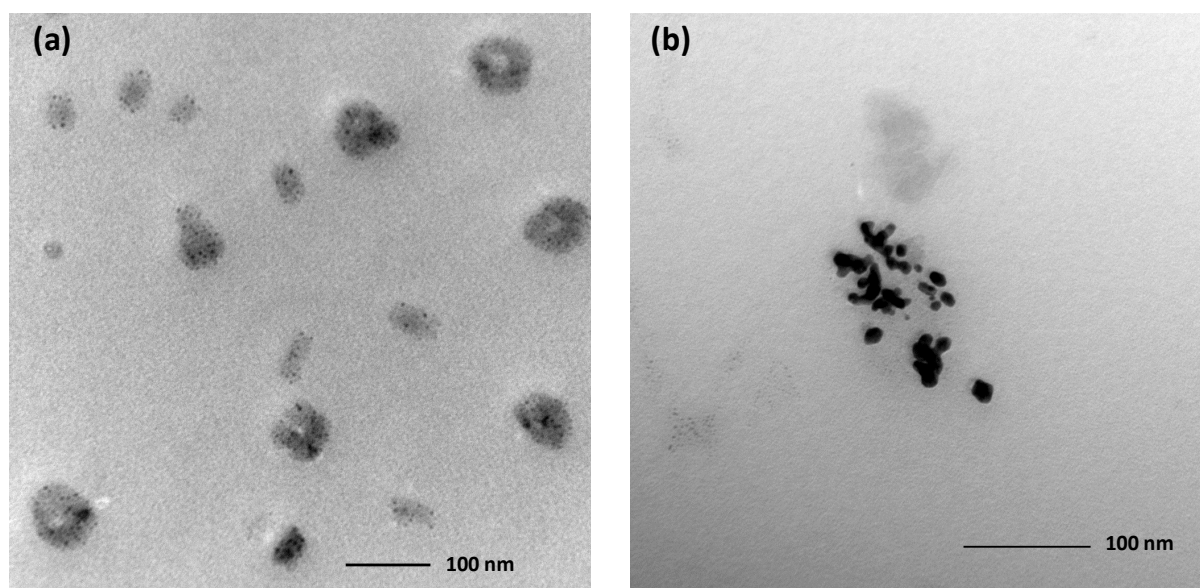

**Figure S5** SEM images of AgNP@FONPs and AgNP when AgNP@FONPs were dissolved in THF/H<sub>2</sub>O

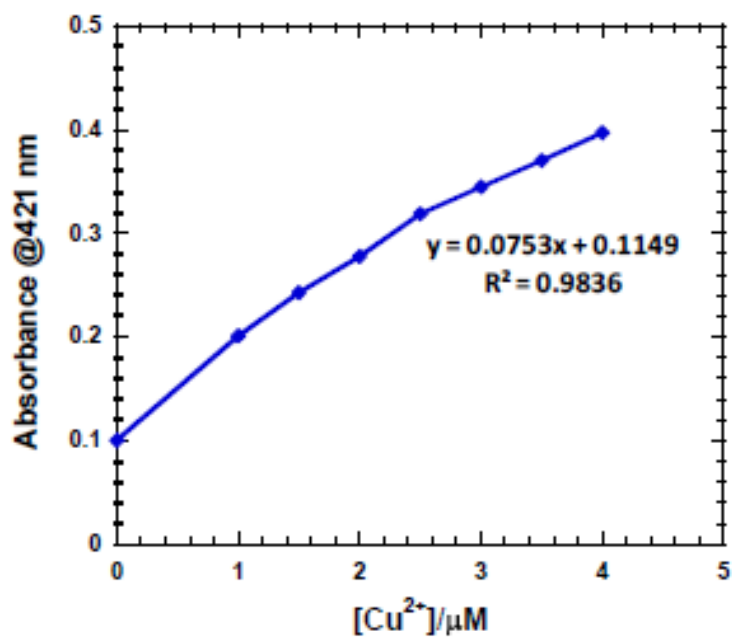

**Figure S6** Plot showing the detection limit of  $Cu^{2+}$  ions.

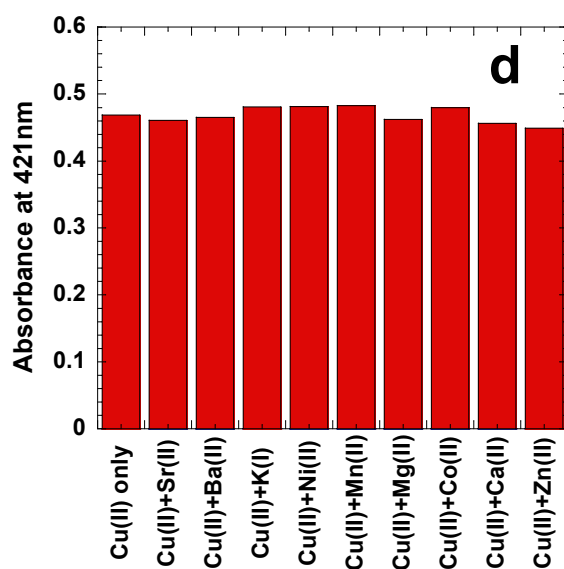

**Figure S7** Histogram showing the amount of intensity towards the selectivity of  $Cu^{2+}$  ions binding to Ag@FONPs in the presence of other ions.

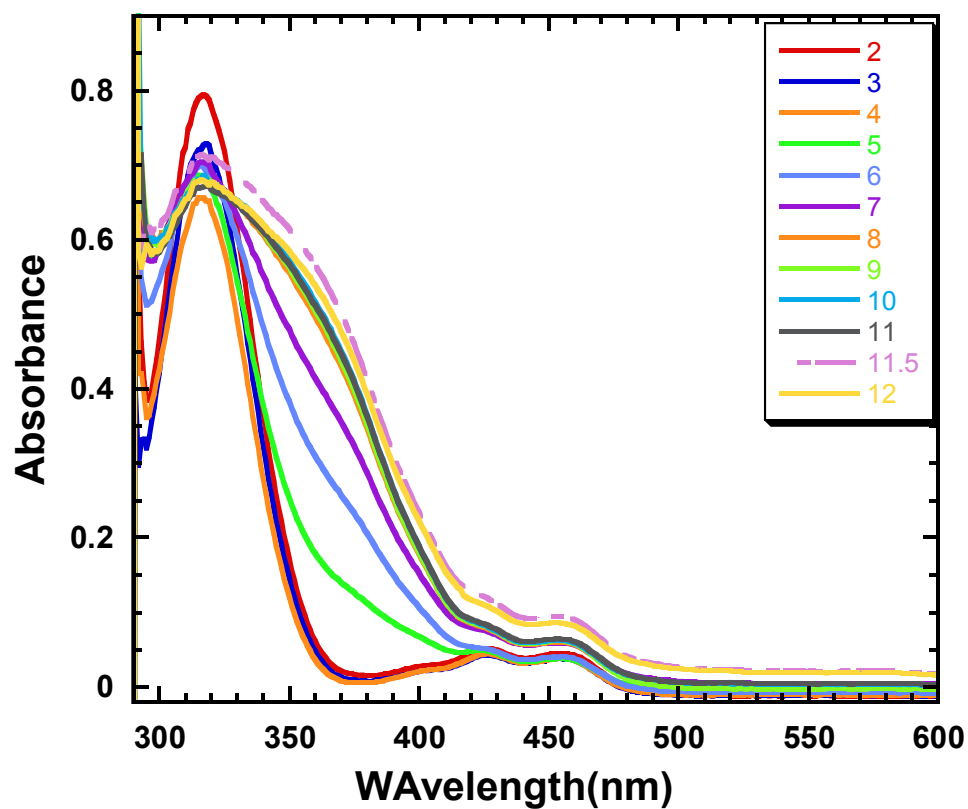

**Figure S8** Effect of pH on the UV-visible absorbance of Ag@ONPs.

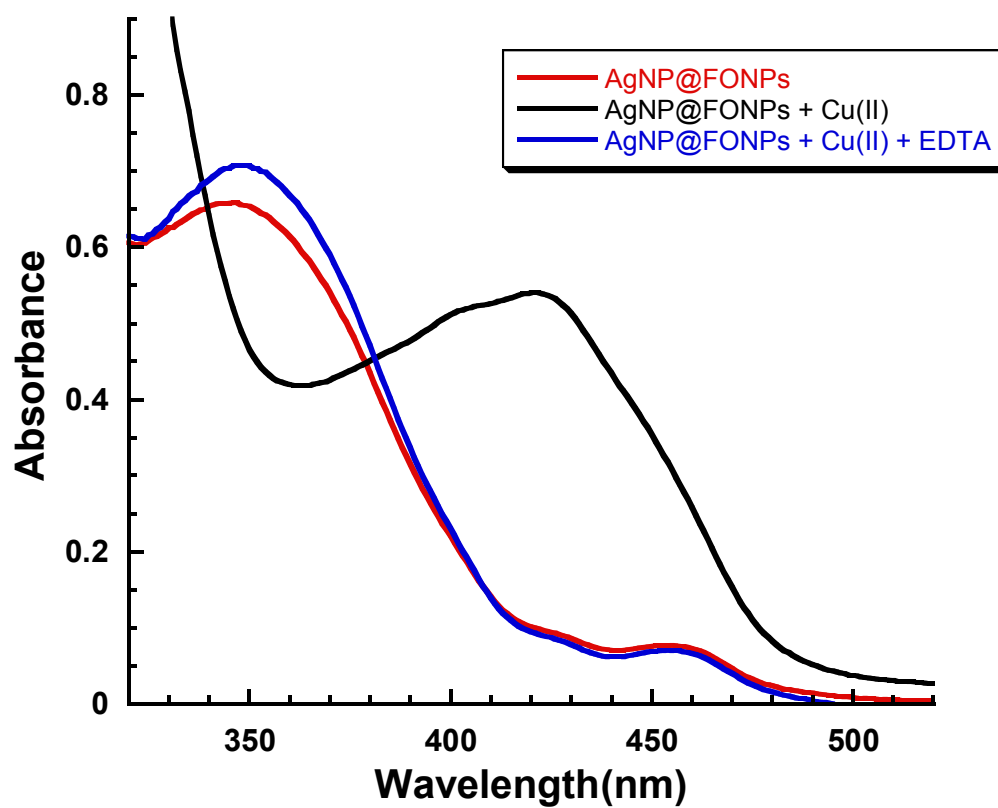

**Figure S9** UV-Vis profile of AgNP@FONPs, AgNP@FONPs + Cu<sup>2+</sup> (50mM) and AgNP@FONPs + Cu<sup>2+</sup> (50mM) + EDTA (50mM).

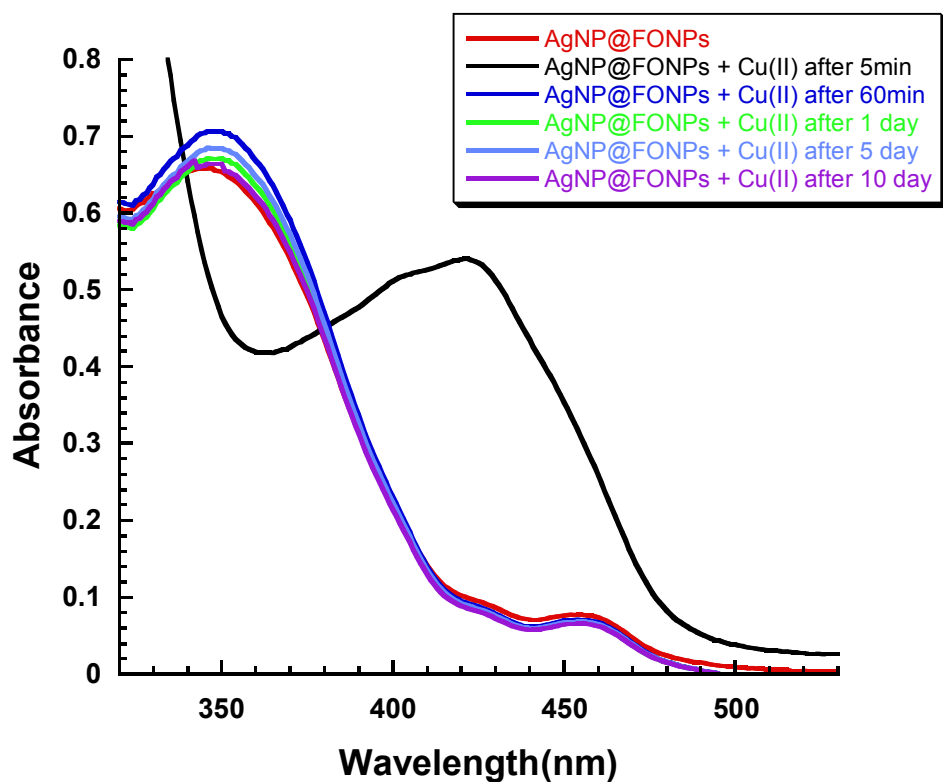

**Figure 10** Changes in UV-Vis spectra of AgNPs @FONPs on addition of  $\text{Cu}^{2+}$  ion after different time intervals

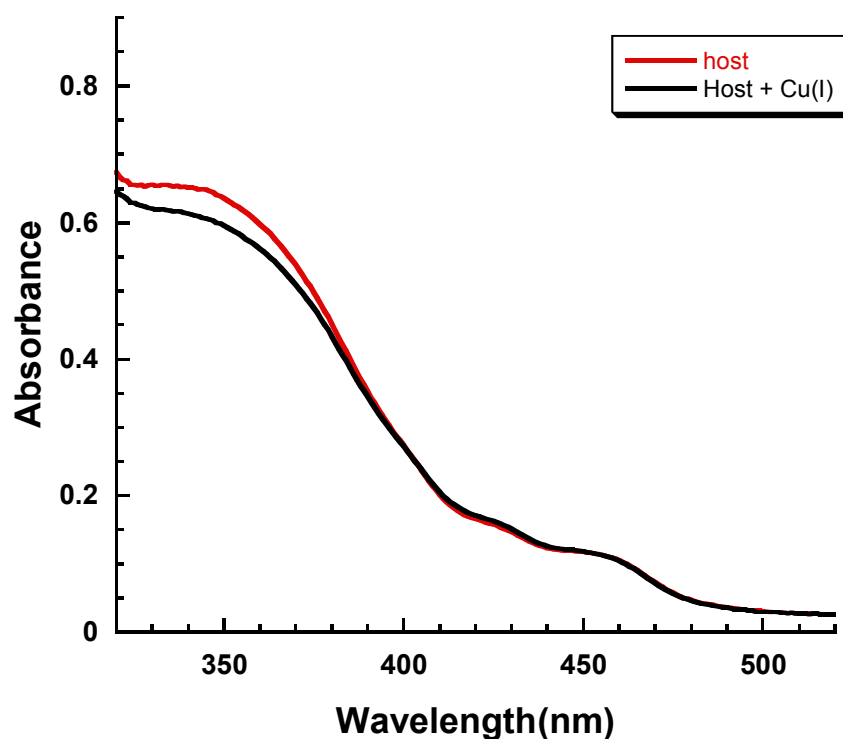

**Figure S11** UV-Vis profile on addition of 50mM of  $\text{Cu}^{+}$  to the AgNP@FNOP solution in aqueous THF (8:2, v/v).

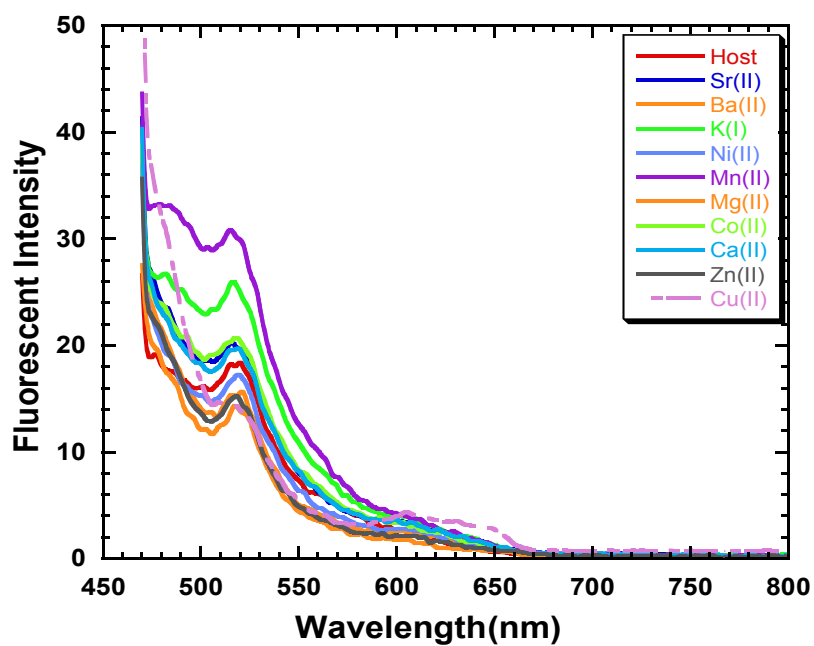

**Figure S12a:** Changes in the Fluorescent spectrum on addition various metal ion to the solution of Ag@FONPs.

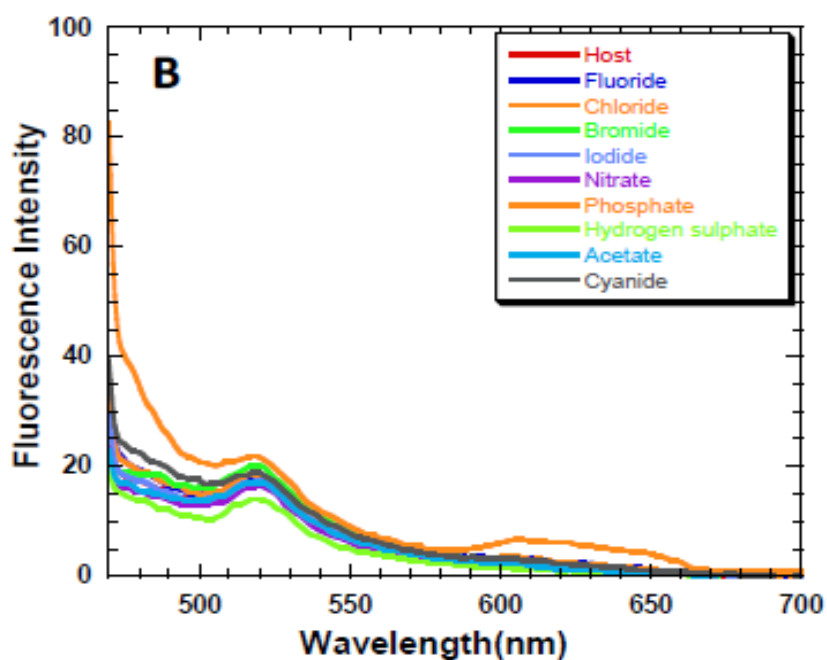

**Figure S12b:** Changes in the Fluorescent spectrum on addition various anions to the solution of Ag@FONPs.



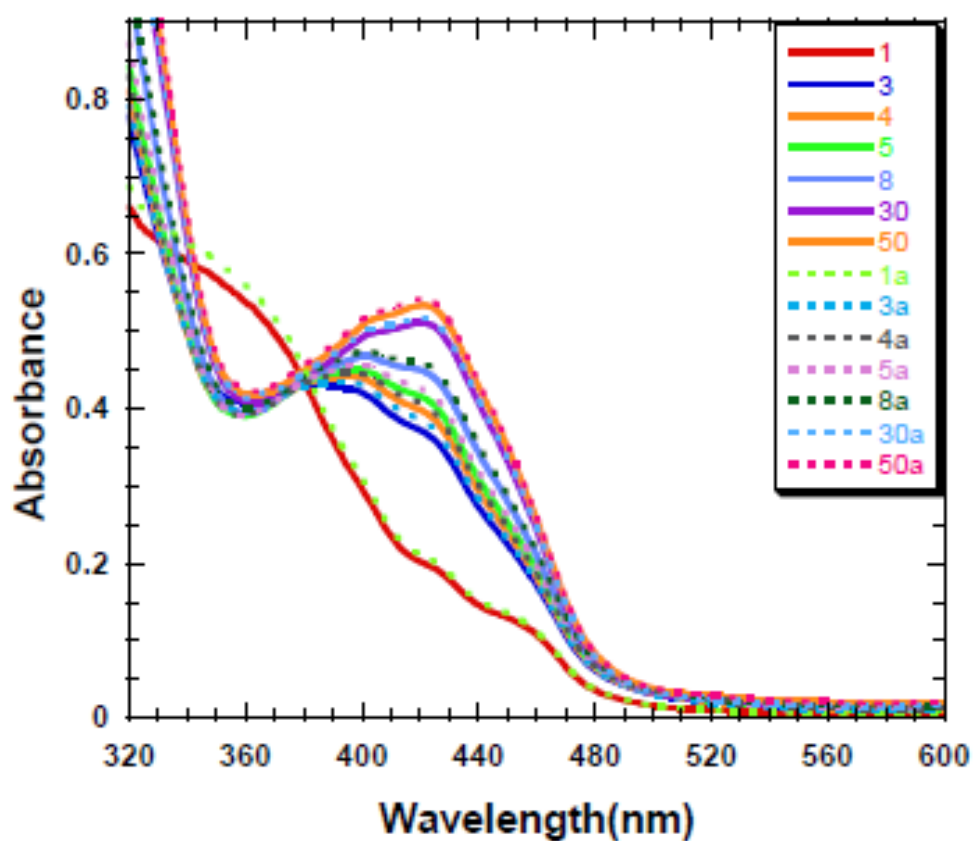

**Figure S13** : Changes in the absorption behaviour of AgNP@FONPs +Cu<sup>2+</sup> ( at 1, 3, 4, 5, 8,30 and 50 mM concentration of Cu<sup>2+</sup>); the same experient was conducted in blood serum at same concentration as that of Cu<sup>2+</sup> ion (1a, 3a, 4a, 5a, 8a, 30a and 50a).

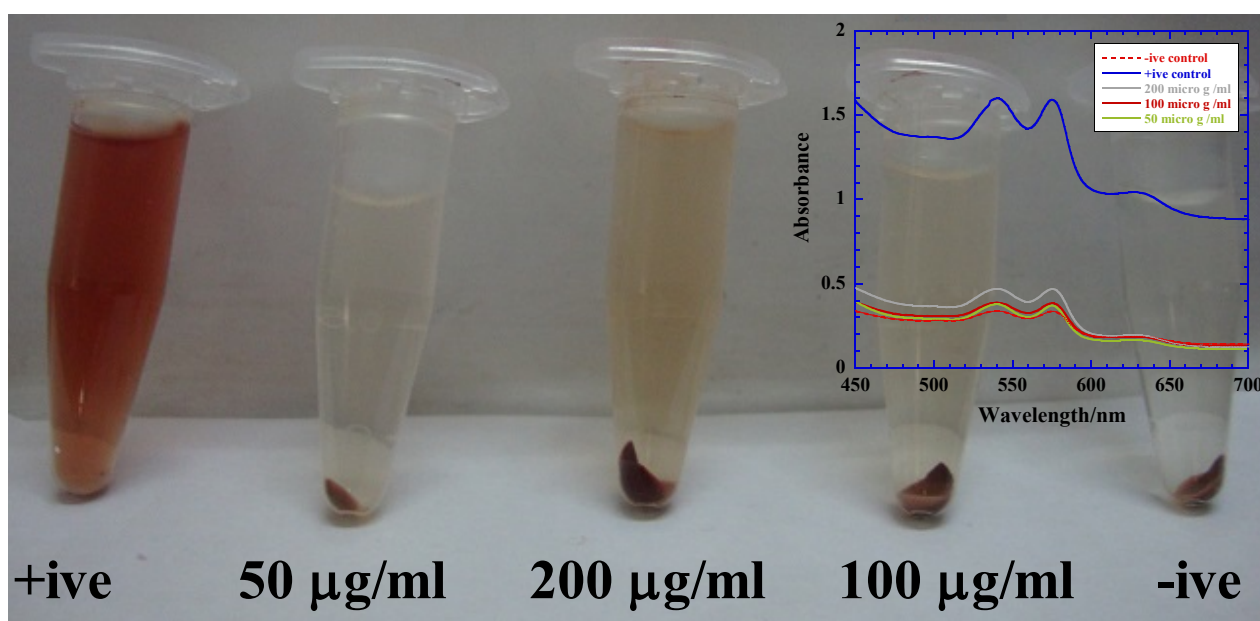

**Figure S14** Photos show the extent hemolysis for the samples with +ive control, -ive control, and different amounts of NPs along with their corresponding absorbance in the inset.
